# Supplementary material for: Signatures of positive selection in African Butana and Kenana dairy zebu cattle
Source: PubMed Central journal article supplement (PMC5754058; doi:10.1371/journal.pone.0190446), 2018-01-04

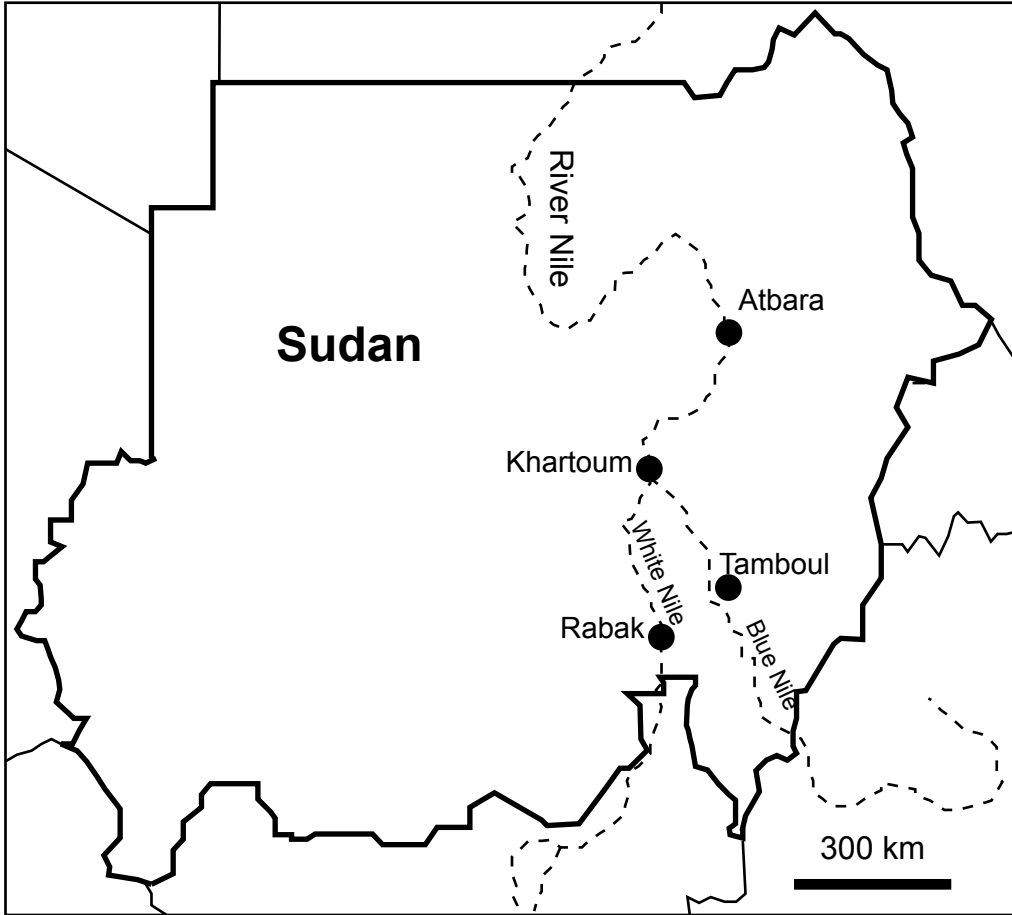

Supplement: pone.0190446.s001.pdf [file pone.0190446.s001.pdf]
